# Supplementary material for: Antimycobacterial Activity of a New Peptide Polydim-I Isolated from Neotropical Social Wasp Polybia dimorpha
Source: PubMed Central journal article supplement (PMC4773228; doi:10.1371/journal.pone.0149729), 2016-03-01
Supplement: pone.0149729.s001.pdf [file pone.0149729.s001.pdf]

**Experiment RCN MIC01 - June 15**

**Plate 1.1**

| Polydim Dilution (µg/mL) |   | Number of CFU / mL x 10 <sup>-4</sup> per well |         |         |        |         |         |         |         |             |            | GO 06 |                |                  |
|--------------------------|---|------------------------------------------------|---------|---------|--------|---------|---------|---------|---------|-------------|------------|-------|----------------|------------------|
|                          |   | GO 01 1                                        | GO 01 2 | GO 06 3 | GO06 4 | GO 07 5 | GO 07 6 | GO 08 7 | GO 08 8 | ATCC19977 9 | CRM0020 10 | 11    | Clarithromycin | Dilution (µg/mL) |
| 243.2                    | A | 0                                              | 0       | 0       | 0      | 0       | 0       | 0       | 0       | 0           | 0          | 0     | 0              | 8                |
| 121.6                    | B | 0                                              | 0       | 0       | 0      | 0       | 0       | 0       | 0       | 0           | 0          | 0     | 0              | 4                |
| 60.8                     | C | 0                                              | 0       | 0       | 0      | 0       | 0       | 0       | 0       | 0           | 0          | 0     | 0              | 2                |
| 30.4                     | D | 2.24                                           | 2.64    | 6.16    | 4.08   | 0.88    | 0.56    | 1.68    | 1.76    | 0.8         | 1.52       | 0     | 0              | 1                |
| 15.2                     | E | 8                                              | 8.24    | 12.4    | 13.92  | 3.36    | 2.4     | 5.36    | 5.44    | 4.64        | 4.4        | 1.04  | 0.5            | 0.5              |
| 7.6                      | F | NC                                             | NC      | NC      | NC     | NC      | NC      | NC      | NC      | NC          | NC         | 3.6   | 0.25           | 0.25             |
| 3.8                      | G | NC                                             | NC      | NC      | NC     | NC      | NC      | NC      | NC      | NC          | NC         | 7.04  | 0.125          | 0.125            |

Number of CFU / mL x 10<sup>-4</sup> per well

NC Not counted

0 = No growth

MIC

**Plate 1.2**

| Polydim Dilution (µg/mL) |   | GO 013 |      |      |       |   | ATCC19977 |      | CRM0020 |   | GO 06 |      |       |
|--------------------------|---|--------|------|------|-------|---|-----------|------|---------|---|-------|------|-------|
|                          |   | 1      | 2    | 3    | 4     | 5 | 6         | 7    | 8       | 9 | 10    | 11   | 12    |
| 243.2                    | A | 0      | 0    | 0    | 0     |   |           | 0    | 0       |   |       | 0    | 8     |
| 121.6                    | B | 0      | 0    | 0    | 0     |   |           | 0    | 0       |   |       | 0    | 4     |
| 60.8                     | C | 0.08   | 0    | 0    | 0     |   |           | 0    | 0       |   |       | 0    | 2     |
| 30.4                     | D | 3.04   | 2.64 | 4.4  | 3.68  |   |           | 1.2  | 2.32    |   |       | 0    | 1     |
| 15.2                     | E | 9.04   | 7.92 | 9.84 | 13.28 |   |           | 5.44 | 5.52    |   |       | 1.2  | 0.5   |
| 7.6                      | F | NC     | NC   | NC   | NC    |   |           | NC   | NC      |   |       | 6.08 | 0.25  |
| 3.8                      | G | NC     | NC   | NC   | NC    |   |           | NC   | NC      |   |       | 7.12 | 0.125 |

Number of CFU / mL x 10<sup>-4</sup> per well

NC Not counted

0 = No growth

MIC

**Experiment RCN MIC02 - June 22**

**Plate 2.1**

| Polydim Dilution (µg/mL) |   | Number of CFU / mL x 10 <sup>-4</sup> per well |         |         |        |         |         |         |         |             |            | GO 06 |                |
|--------------------------|---|------------------------------------------------|---------|---------|--------|---------|---------|---------|---------|-------------|------------|-------|----------------|
|                          |   | GO 01 1                                        | GO 01 2 | GO 06 3 | GO06 4 | GO 07 5 | GO 07 6 | GO 08 7 | GO 08 8 | ATCC19977 9 | CRM0020 10 | 11    | Clarithromycin |
| 243.2                    | A | 0                                              | 0       | 0       | 0      | 0       | 0       | 0       | 0       | 0           | 0          | 0     | 8              |
| 121.6                    | B | 0                                              | 0       | 0       | 0      | 0       | 0       | 0       | 0       | 0           | 0          | 0     | 4              |
| 60.8                     | C | 0                                              | 0       | 0       | 0      | 0       | 0       | 0       | 0       | 0           | 0          | 0     | 2              |
| 30.4                     | D | 4.64                                           | 7.04    | 3.04    | 4.4    | 2       | 2.32    | 5.44    | 2       | 1.52        | 1.76       | 0     | 1              |
| 15.2                     | E | 13.6                                           | 10.64   | 7.84    | 10.24  | 6.24    | 6.4     | 5.44    | 6.16    | 4.56        | 4.96       | 1.84  | 0.5            |
| 7.6                      | F | NC                                             | NC      | NC      | NC     | NC      | NC      | NC      | NC      | NC          | NC         | 4.16  | 0.25           |
| 3.8                      | G | NC                                             | NC      | NC      | NC     | NC      | NC      | NC      | NC      | NC          | NC         | 7.12  | 0.125          |

Number of CFU / mL x 10<sup>-4</sup> per well

NC Not counted

0 = No growth

MIC

**Plate 2.2**

| Polydim Dilution (µg/mL) |   | GO 013 |      |      |      |   | ATCC19977 |      | CRM0020 |   | GO 06 |      |       |
|--------------------------|---|--------|------|------|------|---|-----------|------|---------|---|-------|------|-------|
|                          |   | 1      | 2    | 3    | 4    | 5 | 6         | 7    | 8       | 9 | 10    | 11   | 12    |
| 243.2                    | A | 0      | 0    | 0    | 0    |   |           | 0    | 0       |   |       | 0    | 8     |
| 121.6                    | B | 0      | 0    | 0    | 0    |   |           | 0    | 0       |   |       | 0    | 4     |
| 60.8                     | C | 0      | 0    | 0.24 | 0    |   |           | 0    | 0       |   |       | 0    | 2     |
| 30.4                     | D | 3.12   | 2.32 | 0.4  | 0.56 |   |           | 1.2  | 3.52    |   |       | 0    | 1     |
| 15.2                     | E | 6.24   | 4.8  | 4.08 | 3.92 |   |           | 6.16 | 9.84    |   |       | 2.16 | 0.5   |
| 7.6                      | F | NC     | NC   | NC   | NC   |   |           | NC   | NC      |   |       | 3.68 | 0.25  |
| 3.8                      | G | NC     | NC   | NC   | NC   |   |           | NC   | NC      |   |       | 8.08 | 0.125 |

Number of CFU / mL x 10<sup>-4</sup> per well

NC Not counted

0 = No growth

MIC
