# Supplementary material for: Antimycobacterial Activity of a New Peptide Polydim-I Isolated from Neotropical Social Wasp Polybia dimorpha
Source: PubMed Central journal article supplement (PMC4773228; doi:10.1371/journal.pone.0149729), 2016-03-01
Supplement: pone.0149729.s002.pdf [file pone.0149729.s002.pdf]

Macrophage + Polydim-I+ *M. abscessus subsp massiliense*

DATE:

**GO01**

| Polydim-I |          |  | CTRL |          |  | CLR |          |
|-----------|----------|--|------|----------|--|-----|----------|
| 175       | 17500000 |  | 246  | 24600000 |  | 182 | 18200000 |
| 220       | 22000000 |  | 286  | 28600000 |  | 171 | 17100000 |
| 176       | 17600000 |  |      |          |  | 123 | 12300000 |
| 227       | 22700000 |  |      |          |  | 191 | 19100000 |

**GO06**

| Polydim-I |          |  | CTRL |          |  | CLR |          |
|-----------|----------|--|------|----------|--|-----|----------|
| 120       | 12000000 |  | 238  | 23800000 |  | 212 | 21200000 |
| 160       | 16000000 |  | 212  | 21200000 |  | 95  | 9500000  |
| 115       | 11500000 |  |      |          |  | 120 | 12000000 |
| 100       | 10000000 |  |      |          |  | 97  | 9700000  |

**GO08**

| Polydim-I |          |  | CTRL |          |  | CLR |          |
|-----------|----------|--|------|----------|--|-----|----------|
| 166       | 16600000 |  | 222  | 22200000 |  | 135 | 13500000 |
| 156       | 15600000 |  | 233  | 23300000 |  | 110 | 11000000 |
| 143       | 14300000 |  |      |          |  | 137 | 13700000 |
| 131       | 13100000 |  |      |          |  | 120 | 12000000 |

**GO13**

| Polydim-I |          |  | CTRL |          |  | CLR |          |
|-----------|----------|--|------|----------|--|-----|----------|
| 146       | 14600000 |  | 294  | 29400000 |  | 95  | 9500000  |
| 157       | 15700000 |  | 219  | 21900000 |  | 105 | 10500000 |
| 123       | 12300000 |  |      |          |  | 75  | 7500000  |
| 136       | 13600000 |  |      |          |  | 107 | 10700000 |

**GO18**

| Polydim-I |          |  | CTRL |          |  | CLR |         |
|-----------|----------|--|------|----------|--|-----|---------|
| 120       | 12000000 |  | 300  | 30000000 |  | 84  | 8400000 |
| 136       | 13600000 |  | 293  | 29300000 |  | 99  | 9900000 |
| 196       | 19600000 |  |      |          |  | 85  | 8500000 |
| 140       | 14000000 |  |      |          |  | 96  | 9600000 |

**GO07**

| Polydim-I |         |  | CTRL |          |  | CLR |          |
|-----------|---------|--|------|----------|--|-----|----------|
| 95        | 9500000 |  | 156  | 15600000 |  | 95  | 9500000  |
| 87        | 8700000 |  | 222  | 22200000 |  | 135 | 13500000 |
| 97        | 9700000 |  |      |          |  | 137 | 13700000 |
| cont      | #VALUE! |  |      |          |  | 98  | 9800000  |

**CRM020**

| Polydim-I |          |  | CTRL |          |  | CLR |         |
|-----------|----------|--|------|----------|--|-----|---------|
| 166       | 16600000 |  | 279  | 27900000 |  | 86  | 8600000 |
| 156       | 15600000 |  | 265  | 26500000 |  | 93  | 9300000 |
| 143       | 14300000 |  |      |          |  | 91  | 9100000 |
| 131       | 13100000 |  |      |          |  | 94  | 9400000 |

**ATCC14**

| Polydim-I |          |  | CTRL |          |  | CLR |         |
|-----------|----------|--|------|----------|--|-----|---------|
| 152       | 15200000 |  | 168  | 16800000 |  | 88  | 8800000 |
| 139       | 13900000 |  | 198  | 19800000 |  | 77  | 7700000 |
| 156       | 15600000 |  |      |          |  | 78  | 7800000 |
| 126       | 12600000 |  |      |          |  | 87  | 8700000 |
