# Supplementary material for: Antimycobacterial Activity of a New Peptide Polydim-I Isolated from Neotropical Social Wasp Polybia dimorpha
Source: PubMed Central journal article supplement (PMC4773228; doi:10.1371/journal.pone.0149729), 2016-03-01
Supplement: pone.0149729.s003.pdf [file pone.0149729.s003.pdf]

Polydim I

Cytotoxicity assays

**LDH**

Concentration ( $\mu\text{g/ml}$ )

cytotoxicity (%)

|       |      |    |    |
|-------|------|----|----|
| 7.6   | 7    | 0  | 3  |
| 15.2  | 0    | 5  | 2  |
| 60.8  | 16.7 | 15 | 20 |
| 121.6 | 70   | 67 | 75 |

**Hemolysis**

Concentration ( $\mu\text{g/ml}$ )

hemolysis (%)

|       |     |     |     |
|-------|-----|-----|-----|
| 7.6   | 0   | 0.1 | 0.3 |
| 15.2  | 0   | 0.3 | 0.4 |
| 60.8  | 0   | 0.4 | 0.5 |
| 121.6 | 1.8 | 2.3 | 2.2 |
