# Supplementary material for: Antimycobacterial Activity of a New Peptide Polydim-I Isolated from Neotropical Social Wasp Polybia dimorpha
Source: PubMed Central journal article supplement (PMC4773228; doi:10.1371/journal.pone.0149729), 2016-03-01
Supplement: pone.0149729.s004.pdf [file pone.0149729.s004.pdf]

DATE: 09/30/2014

Experiment 1

In vivo

**LUNG****PBS**

|               |  |  |    |        |                  |
|---------------|--|--|----|--------|------------------|
| <b>Day 1</b>  |  |  | 60 | 60000  | 10 <sup>^2</sup> |
|               |  |  | 62 | 620000 |                  |
| <b>Day 18</b> |  |  | 91 | 910000 | 10 <sup>^3</sup> |
|               |  |  | 93 | 930000 |                  |
| <b>Day 26</b> |  |  | 66 | 660000 | 10 <sup>^3</sup> |
|               |  |  | 60 | 600000 |                  |
|               |  |  | 50 | 500000 |                  |
|               |  |  | 59 | 590000 |                  |

**CLR 200mg**

|               |    |        |                  |
|---------------|----|--------|------------------|
| <b>Day 1</b>  | 60 | 600000 | 10 <sup>^2</sup> |
|               | 62 | 620000 |                  |
| <b>Day 18</b> | 91 | 910000 | 10 <sup>^3</sup> |
|               | 93 | 930000 |                  |
| <b>Day 26</b> | 10 | 1000   | 10 <sup>^1</sup> |
|               | 15 | 1500   |                  |
|               | 9  | 900    |                  |
|               | 7  | 700    |                  |

**Polydim-I 2mg**

|               |     |        |                  |
|---------------|-----|--------|------------------|
| <b>Day 1</b>  | 60  | 600000 | 10 <sup>^2</sup> |
|               | 62  | 620000 |                  |
| <b>Day 18</b> | 91  | 910000 | 10 <sup>^3</sup> |
|               | 93  | 930000 |                  |
| <b>Day 26</b> | 100 | 10000  | 10 <sup>^1</sup> |
|               | 135 | 13500  |                  |
|               | 124 | 12400  |                  |
|               | 158 | 15800  |                  |

**Polydim-I 1mg**

|               |    |        |                  |
|---------------|----|--------|------------------|
| <b>Day 1</b>  | 60 | 600000 | 10 <sup>^2</sup> |
|               | 62 | 620000 |                  |
| <b>Day 18</b> | 91 | 910000 | 10 <sup>^3</sup> |
|               | 93 | 930000 |                  |
| <b>Day 26</b> | 11 | 11000  | 10 <sup>^2</sup> |
|               | 28 | 28000  |                  |
|               | 22 | 22000  |                  |
|               | 18 | 18000  |                  |

**Polydim-I 0.5mg**

|               |     |        |                  |
|---------------|-----|--------|------------------|
| <b>Day 1</b>  | 60  | 600000 | 10 <sup>^2</sup> |
|               | 62  | 620000 |                  |
| <b>Day 18</b> | 91  | 910000 | 10 <sup>^3</sup> |
|               | 93  | 930000 |                  |
| <b>Day 26</b> | 122 | 122000 | 10 <sup>^2</sup> |
|               | 108 | 108000 |                  |
|               | 102 | 102000 |                  |
|               | 127 | 127000 |                  |

MEDIA PBS

587500 (INFECTION 100%)

**CLR 200mg**

|           |           |
|-----------|-----------|
| 0.1702128 | 99.829787 |
| 0.2553191 | 99.744681 |
| 0.1531915 | 99.846809 |
| 0.1191489 | 99.880851 |

**Polydim-I 2mg**

|           |           |
|-----------|-----------|
| 1.7021277 | 98.297872 |
| 2.2978723 | 97.702128 |
| 2.1106383 | 97.889362 |
| 2.6893617 | 97.310638 |

**Polydim-I 1mg**

|           |           |
|-----------|-----------|
| 1.8723404 | 98.12766  |
| 4.7659574 | 95.234043 |
| 3.7446809 | 96.255319 |
| 3.0638298 | 96.93617  |

**Polydim-I 0.5mg**

|           |           |
|-----------|-----------|
| 20.765957 | 79.234043 |
| 18.382979 | 81.617021 |
| 17.361702 | 82.638298 |
| 21.617021 | 78.382979 |

**SPLEEN****PBS**

|  |     |         |                  |
|--|-----|---------|------------------|
|  | 70  | 700000  | 10 <sup>^3</sup> |
|  | 72  | 720000  |                  |
|  | 140 | 1400000 | 10 <sup>^3</sup> |
|  | 141 | 1410000 |                  |
|  | 122 | 1220000 | 10 <sup>^3</sup> |
|  | 155 | 1550000 |                  |
|  | 128 | 1280000 |                  |
|  | 135 | 1350000 |                  |

**CLR 200mg**

|               |     |         |                  |
|---------------|-----|---------|------------------|
| <b>Day 1</b>  | 70  | 700000  | 10 <sup>^3</sup> |
|               | 72  | 720000  |                  |
| <b>Day 18</b> | 140 | 1400000 | 10 <sup>^3</sup> |
|               | 141 | 1410000 |                  |
| <b>Day 26</b> | 15  | 1500    | 10 <sup>^1</sup> |
|               | 20  | 2000    |                  |
|               | 5   | 500     |                  |
|               | 7   | 700     |                  |

**Polydim-I 2mg**

|               |     |         |                  |
|---------------|-----|---------|------------------|
| <b>Day 1</b>  | 70  | 700000  | 10 <sup>^3</sup> |
|               | 72  | 720000  |                  |
| <b>Day 18</b> | 140 | 1400000 | 10 <sup>^3</sup> |
|               | 141 | 1410000 |                  |
| <b>Day 26</b> | 164 | 1640000 | 10 <sup>^2</sup> |
|               | 118 | 118000  |                  |
|               | 118 | 118000  |                  |
|               | 107 | 107000  |                  |

**Polydim-I 1mg**

|               |     |         |                  |
|---------------|-----|---------|------------------|
| <b>Day 1</b>  | 70  | 700000  | 10 <sup>^3</sup> |
|               | 72  | 720000  |                  |
| <b>Day 18</b> | 140 | 1400000 | 10 <sup>^3</sup> |
|               | 141 | 1410000 |                  |
| <b>Day 26</b> | 32  | 320000  | 10 <sup>^3</sup> |
|               | 29  | 290000  |                  |
|               | 40  | 400000  |                  |
|               | 30  | 300000  |                  |

**Polydim-I 0.5mg**

|               |     |         |                  |
|---------------|-----|---------|------------------|
| <b>Day 1</b>  | 70  | 700000  | 10 <sup>^3</sup> |
|               | 72  | 720000  |                  |
| <b>Day 18</b> | 140 | 1400000 | 10 <sup>^3</sup> |
|               | 141 | 1410000 |                  |
| <b>Day 26</b> | 52  | 520000  | 10 <sup>^3</sup> |
|               | 77  | 770000  |                  |
|               | 81  | 810000  |                  |
|               | 60  | 600000  |                  |

**RESULTS DATE REDUCTION**

MEDIA PBS

1350000 (INFECTION 100%)

**CLR 200mg**

|           |           |
|-----------|-----------|
| 0.1111111 | 99.888889 |
| 0.1481481 | 99.851852 |
| 0.037037  | 99.962963 |
| 0.0518519 | 99.948148 |

**Polydim-I 2mg**

|           |           |
|-----------|-----------|
| 12.148148 | 87.851852 |
| 8.7407407 | 91.259259 |
| 8.7407407 | 91.259259 |
| 7.9259259 | 92.074074 |

**Polydim-I 1mg**

|           |           |
|-----------|-----------|
| 23.703704 | 76.296296 |
| 21.481481 | 78.518519 |
| 29.62963  | 70.37037  |
| 22.222222 | 77.777778 |

**Polydim-I 0.5mg**

|           |           |
|-----------|-----------|
| 38.518519 | 61.481481 |
| 57.037037 | 42.962963 |
| 60        | 40        |
| 44.444444 | 55.555556 |

**LIVER****PBS**

|  |     |         |                  |
|--|-----|---------|------------------|
|  | 10  | 100000  | 10 <sup>^3</sup> |
|  | 11  | 110000  |                  |
|  | 110 | 1100000 | 10 <sup>^3</sup> |
|  | 112 | 1120000 |                  |
|  | 176 | 1760000 | 10 <sup>^3</sup> |
|  | 165 | 1650000 |                  |
|  | 156 | 1560000 |                  |
|  | 155 | 1550000 |                  |

**CLR 200mg**

|               |     |         |                  |
|---------------|-----|---------|------------------|
| <b>Day 1</b>  | 10  | 100000  | 10 <sup>^3</sup> |
|               | 11  | 110000  |                  |
| <b>Day 18</b> | 110 | 1100000 | 10 <sup>^3</sup> |
|               | 112 | 1120000 |                  |
| <b>Day 26</b> | 51  | 5100    | 10 <sup>^1</sup> |
|               | 35  | 3500    |                  |
|               | 47  | 4700    |                  |
|               | 53  | 5300    |                  |

**Polydim-I 2mg**

|               |     |         |                  |
|---------------|-----|---------|------------------|
| <b>Day 1</b>  | 10  | 100000  | 10 <sup>^3</sup> |
|               | 11  | 110000  |                  |
| <b>Day 18</b> | 110 | 1100000 | 10 <sup>^3</sup> |
|               | 112 | 1120000 |                  |
| <b>Day 26</b> | 70  | 700000  | 10 <sup>^3</sup> |
|               | 85  | 850000  |                  |
|               | 80  | 800000  |                  |
|               | 97  | 970000  |                  |

**Polydim-I 1mg**

|               |     |         |                  |
|---------------|-----|---------|------------------|
| <b>Day 1</b>  | 10  | 100000  | 10 <sup>^3</sup> |
|               | 11  | 110000  |                  |
| <b>Day 18</b> | 110 | 1100000 | 10 <sup>^3</sup> |
|               | 112 | 1120000 |                  |
| <b>Day 26</b> | 118 | 1180000 | 10 <sup>^3</sup> |
|               | 150 | 1500000 |                  |
|               | 145 | 1450000 |                  |
|               | 144 | 1440000 |                  |

**Polydim-I 0.5mg**

|               |     |         |                  |
|---------------|-----|---------|------------------|
| <b>Day 1</b>  | 10  | 100000  | 10 <sup>^3</sup> |
|               | 11  | 110000  |                  |
| <b>Day 18</b> | 110 | 1100000 | 10 <sup>^3</sup> |
|               | 112 | 1120000 |                  |
| <b>Day 26</b> | 130 | 1300000 | 10 <sup>^3</sup> |
|               | 149 | 1490000 |                  |
|               | 149 | 1490000 |                  |
|               | 141 | 1410000 |                  |

MEDIA PBS

1630000 (INFECTION 100%)

**CLR 200mg**

|           |           |
|-----------|-----------|
| 0.3128834 | 99.687117 |
| 0.2147239 | 99.785276 |
| 0.2883436 | 99.711656 |
| 0.3251534 | 99.674847 |

**Polydim-I 2mg**

|           |           |
|-----------|-----------|
| 42.944785 | 57.055215 |
| 52.147239 | 47.852761 |
| 49.079755 | 50.920245 |
| 59.509202 | 40.490798 |

**Polydim-I 1mg**

|           |           |
|-----------|-----------|
| 72.392638 | 27.607362 |
| 92.02454  | 7.9754601 |
| 88.957055 | 11.042945 |
| 88.343558 | 11.656442 |

**Polydim-I 0.5mg**

|           |           |
|-----------|-----------|
| 79.754601 | 20.245399 |
| 91.411043 | 8.5889571 |
| 91.411043 | 8.5889571 |
| 86.503067 | 13.496933 |
